# Supplementary material for: A simple strategy toward the substitution of styrene by sobrerol-based monomers in unsaturated polyester resins
Source: Royal Society of Chemistry journal article supplement (doi:10.1039/c8gc01214h), 2018-01-01
Supplement: c8gc01214h1.pdf [file c8gc01214h1.pdf]

# Supporting Information

## **Simple strategy towards the substitution of styrene by sobrerol-based monomers in unsaturated polyester resins**

Mafalda S. Lima, Cátia S. M.F. Costa, Jorge F.J. Coelho, Ana C. Fonseca\*, Arménio C. Serra

CEMMPRE, Department of Chemical Engineering, University of Coimbra, Pólo II, Rua sylvio Lima, 3030-790 Coimbra, Portugal

\*Correspondence to: Ana C. Fonseca (E-mail: [anafs@eq.uc.pt](mailto:anafs@eq.uc.pt))

## DETERMINATION OF THE PURITY OF SOBACR AND SOBMET BY <sup>1</sup>H NMR

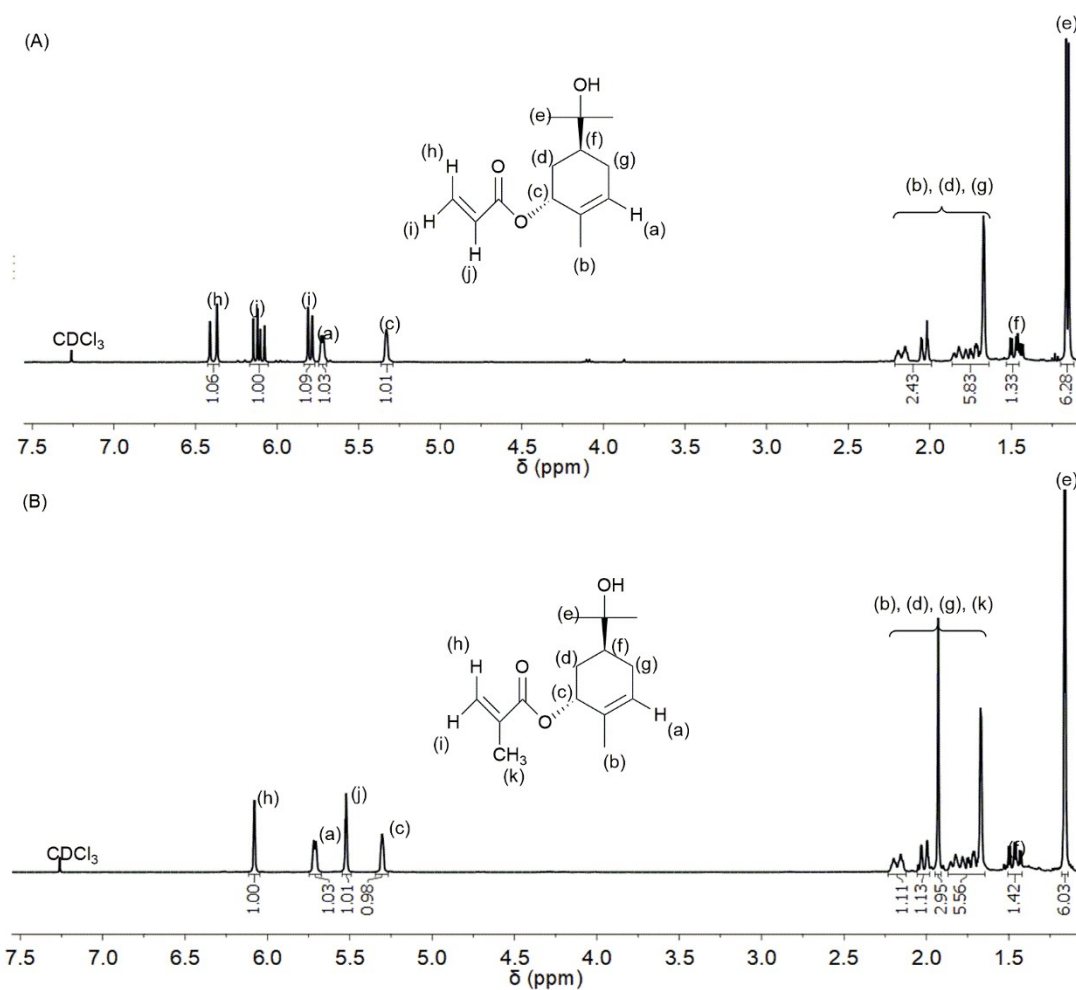

Figure S 2 <sup>1</sup>H NMR spectra of SobAcR (A) and SobMet (B).

The purity of the sobrerol based monomers was calculated by the equation S1:

$$\% \text{ purity} = 1 - \frac{\int \text{alkene protons of SobAcR or SobMet} - \int \text{alkene protons of AcrCl or MetAn}}{\int \text{alkene protons of AcrCl or MetAn}} \times 100$$

The estimated values of purity were found to be 94 % for SobAcR and 97 % for SobMet.

### PROCEDURE FOR THE FREE RADICAL POLYMERIZATION (FRP) OF P(SOBACR) AND P(SOBMET)

To either SobAcR and SobMet (1 g), 3 %m of benzoyl peroxide (BPO; 0.03 g) was added. Upon dissolution at room temperature, the temperature was raised to 80 °C and the reaction allowed to proceed until a hard solid (either P(SobAcR) or P(SobMet)) was attained.

## UPR CHARACTERIZATION

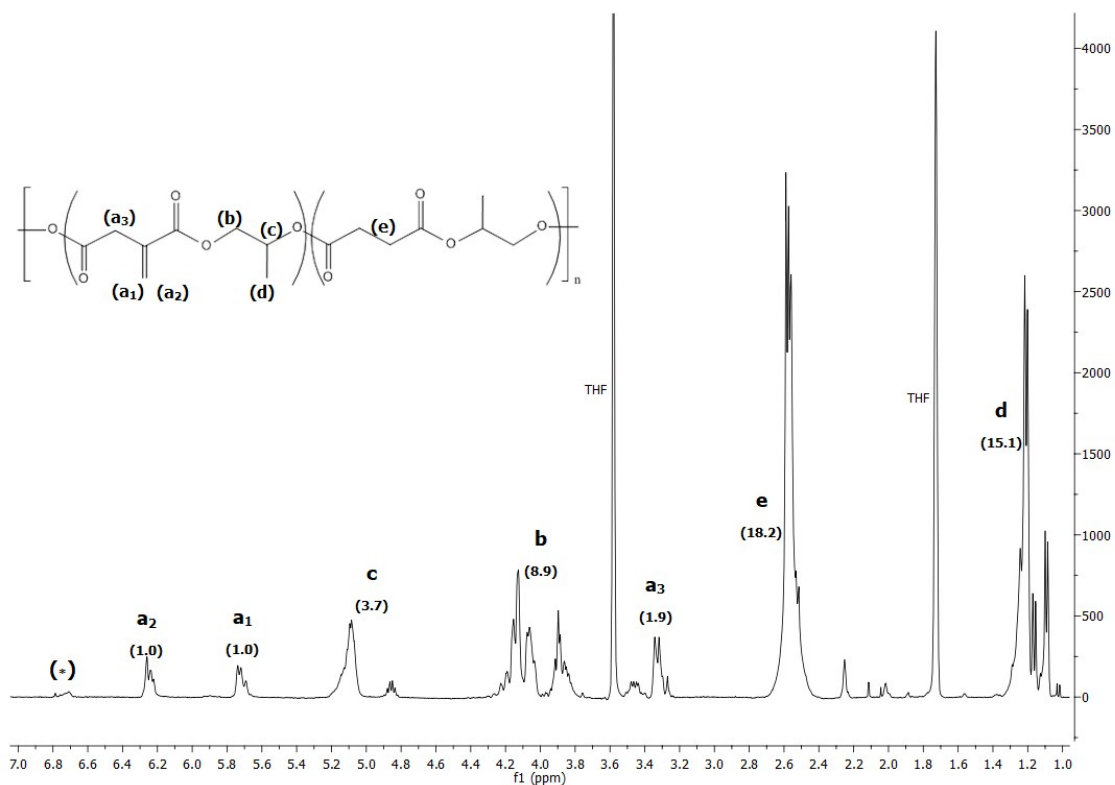

Figure S 2 - $^1\text{H}$  NMR spectrum of a Bio-UP1 sample in THF- $d_8$ .

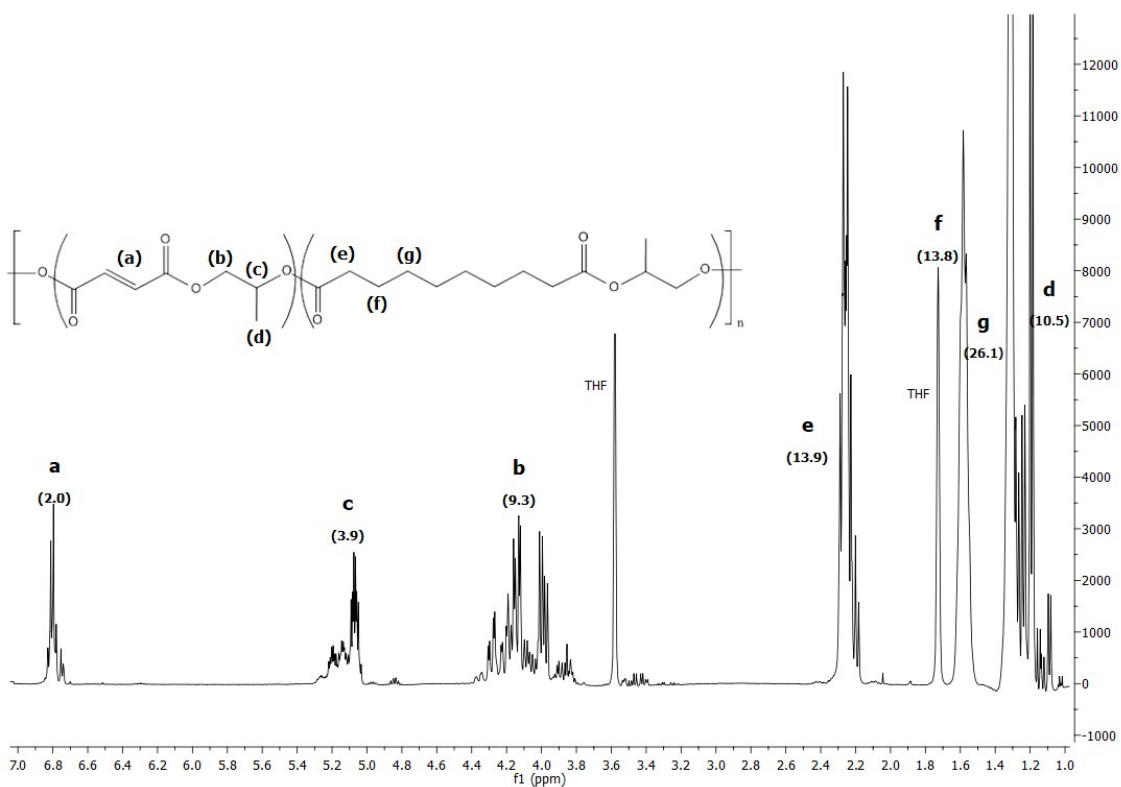

Figure S 3 - $^1\text{H}$  NMR spectrum of a Bio-UP2 sample in THF- $d_8$ .

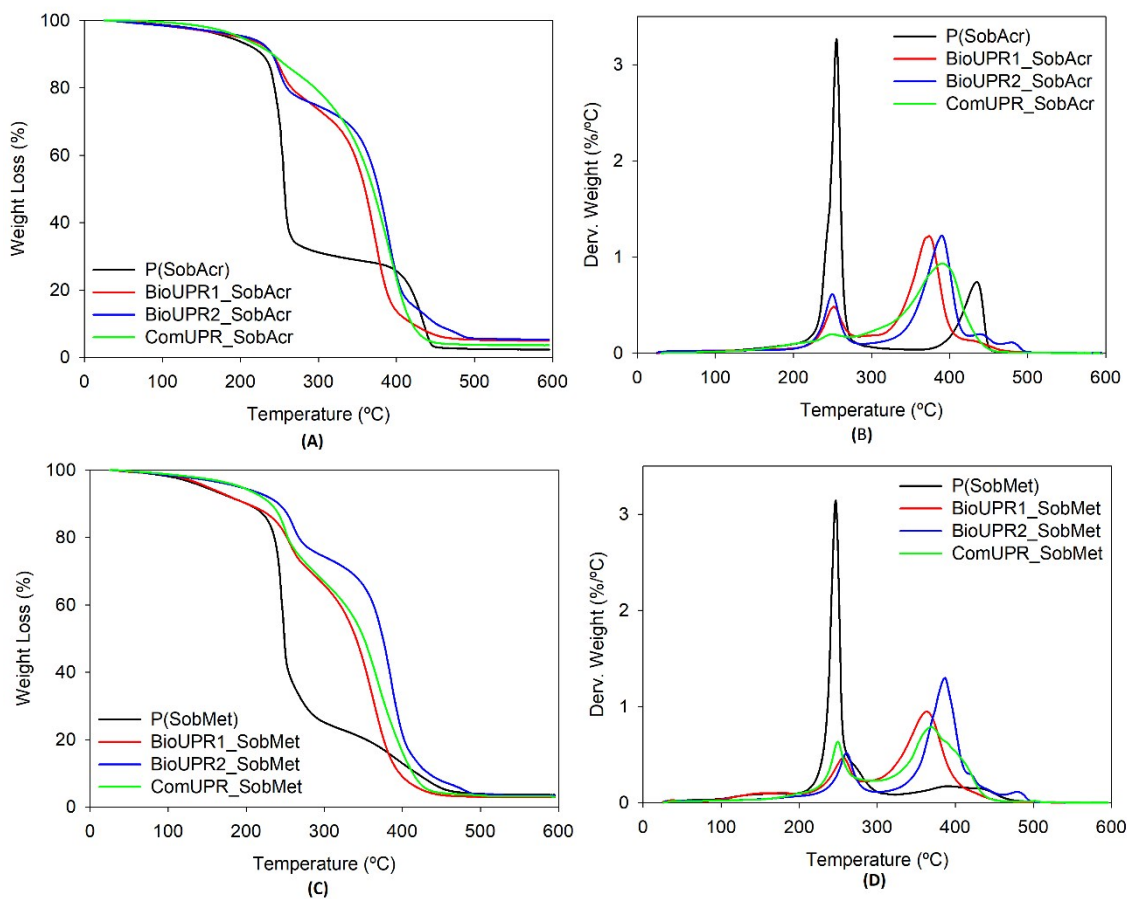

Figure S 4 - Thermogravimetric curves of the SobAcr- ((A) and (B)) and SobMet-containing ((C) and (D)) UPRs in comparison to each of their respective homopolymers P(SobAcr) and P(SobMet).

Table S 1– Characteristic temperatures of the UPRs taken from the TGA.  $T_{5\%}$ : temperature corresponding to 5 % of mass loss;  $T_{10\%}$ : temperature corresponding to 10 % of mass loss;  $T_{max}$ : temperature of maximal rate of decomposition.

| UPR            | $T_{5\%}$ (°C) | $T_{10\%}$ (°C) | $T_{max}$ (°C)  |
|----------------|----------------|-----------------|-----------------|
| BioUPR1_SobAcr | 196.51         | 240.22          | 373.73 (250.94) |
| BioUPR1_SobMet | 149.56         | 198.64          | 363.21 (256.08) |
| BioUPR1_Sty    | 209.25         | 292.16          | 374.43          |
| BioUPR2_SobAcr | 206.20         | 240.48          | 390.03 (249.27) |
| BioUPR2_SobMet | 190.76         | 240.62          | 386.62 (260.58) |
| BioUPR2_Sty    | 249.93         | 328.36          | 384.91          |
| ComUPR_SobAcr  | 201.06         | 241.06          | 390.26 (247.91) |
| ComUPR_SobMet  | 191.14         | 230.07          | 368.98 (249.27) |
| ComUPR_Sty     | 191.23         | 243.25          | 395.13 (207.06) |

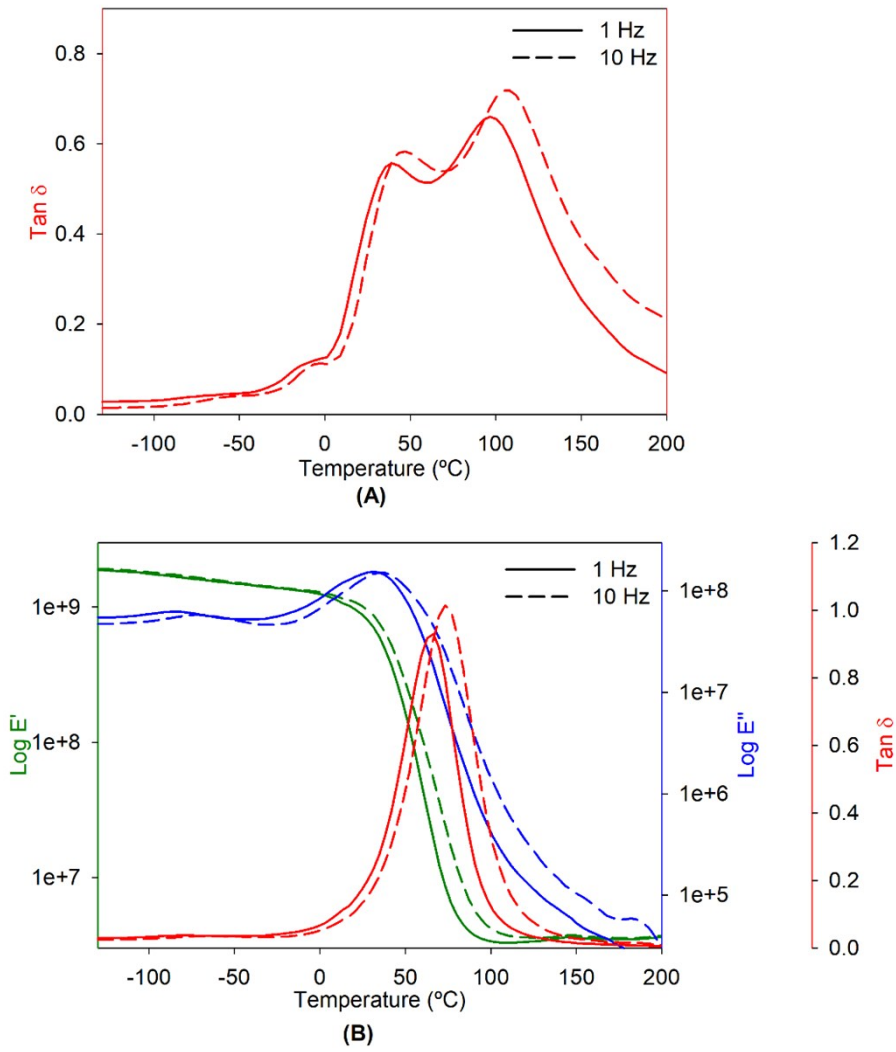

Figure S 5 - DMTA traces of the studied Commercial-UP-based UPRs at frequencies 1 Hz and 10 Hz, with either, SobMet (A) or Sty (B) as the UM.

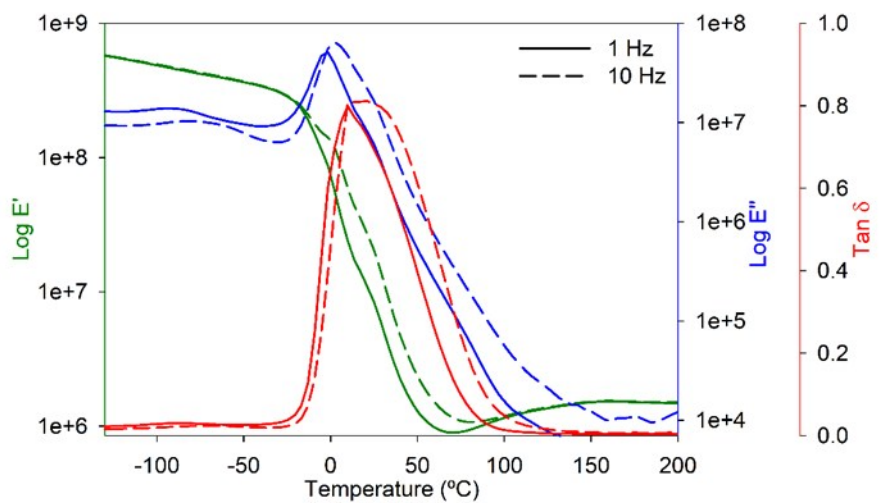

(A)

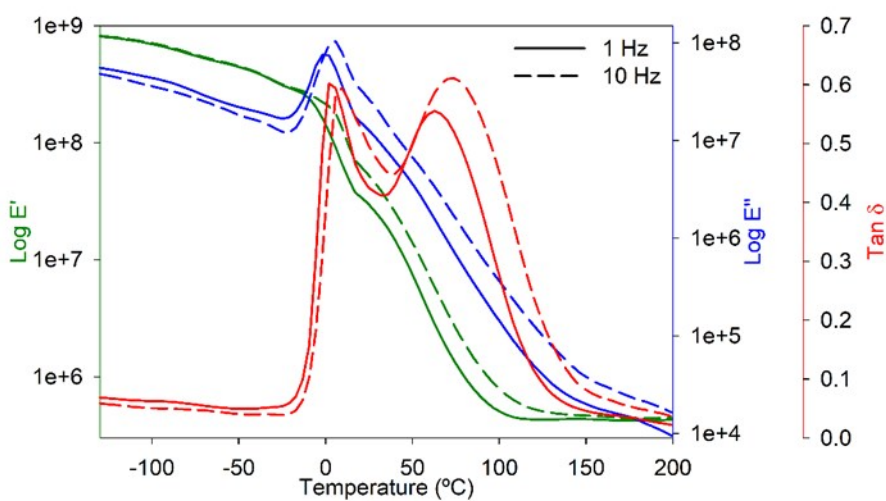

(B)

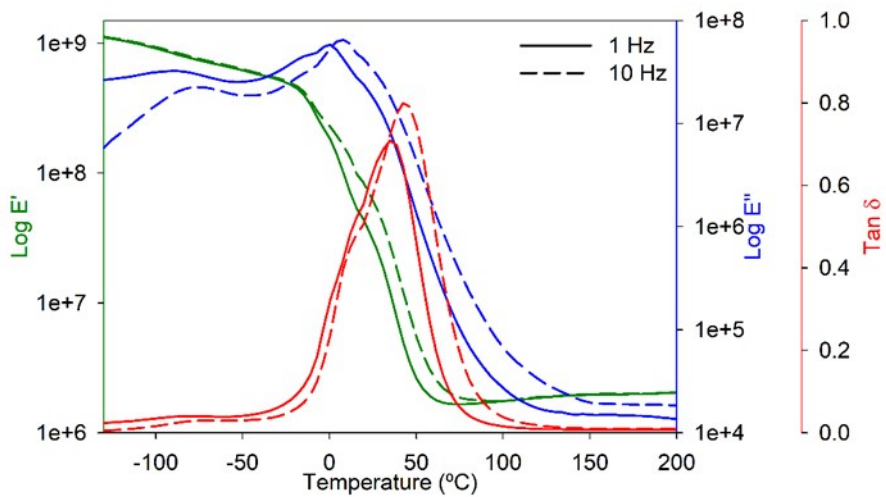

(C)

Figure S 6 - DMTA traces of the studied Bio-UP1-based UPRs at frequencies 1 Hz and 10 Hz, with either SobAcr (A), SobMet (B) or Sty (C) as the UM.

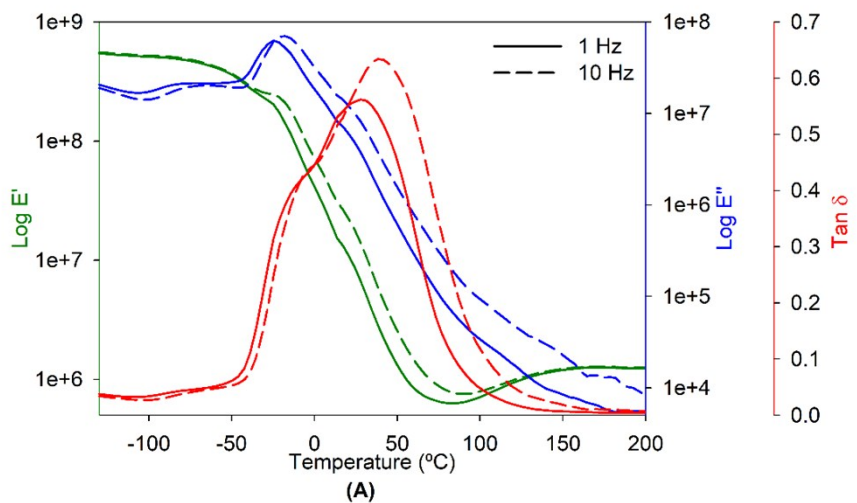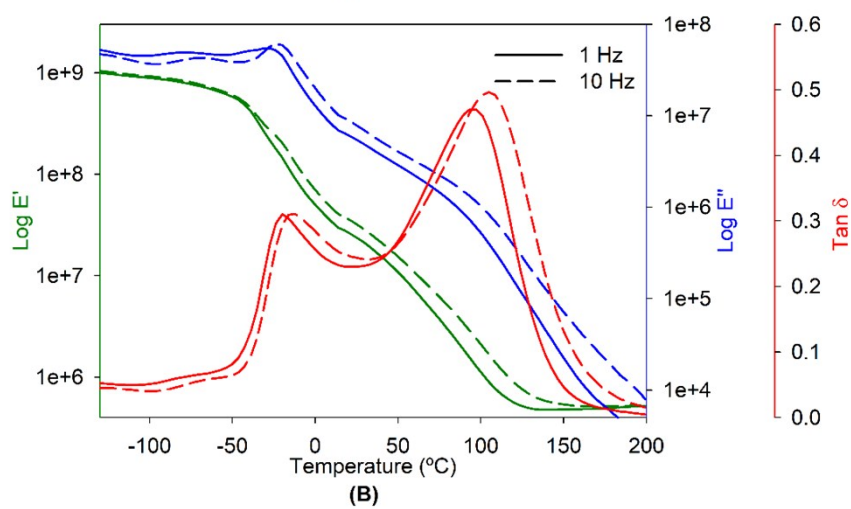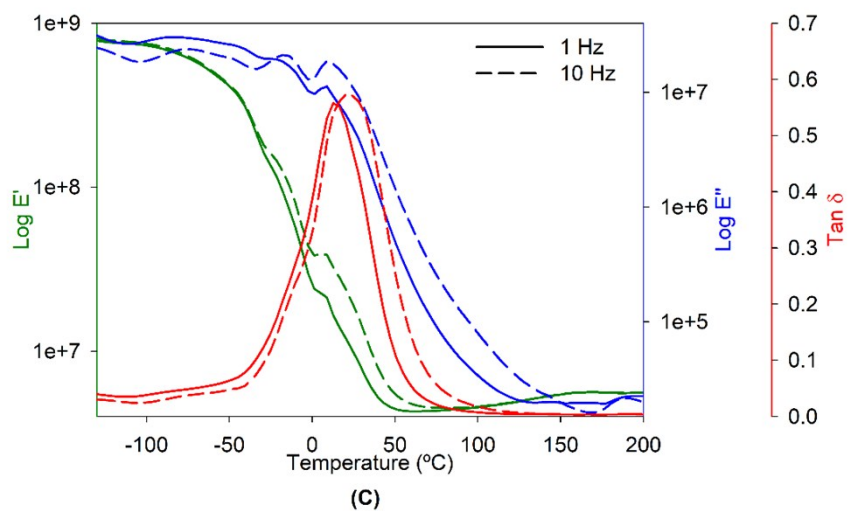

Figure S 7 - DMTA traces of the studied Bio-UP2-based UPRs at frequencies 1 Hz and 10 Hz, with either SobAcr (A), SobMet (B) or Sty (C) as the UM.

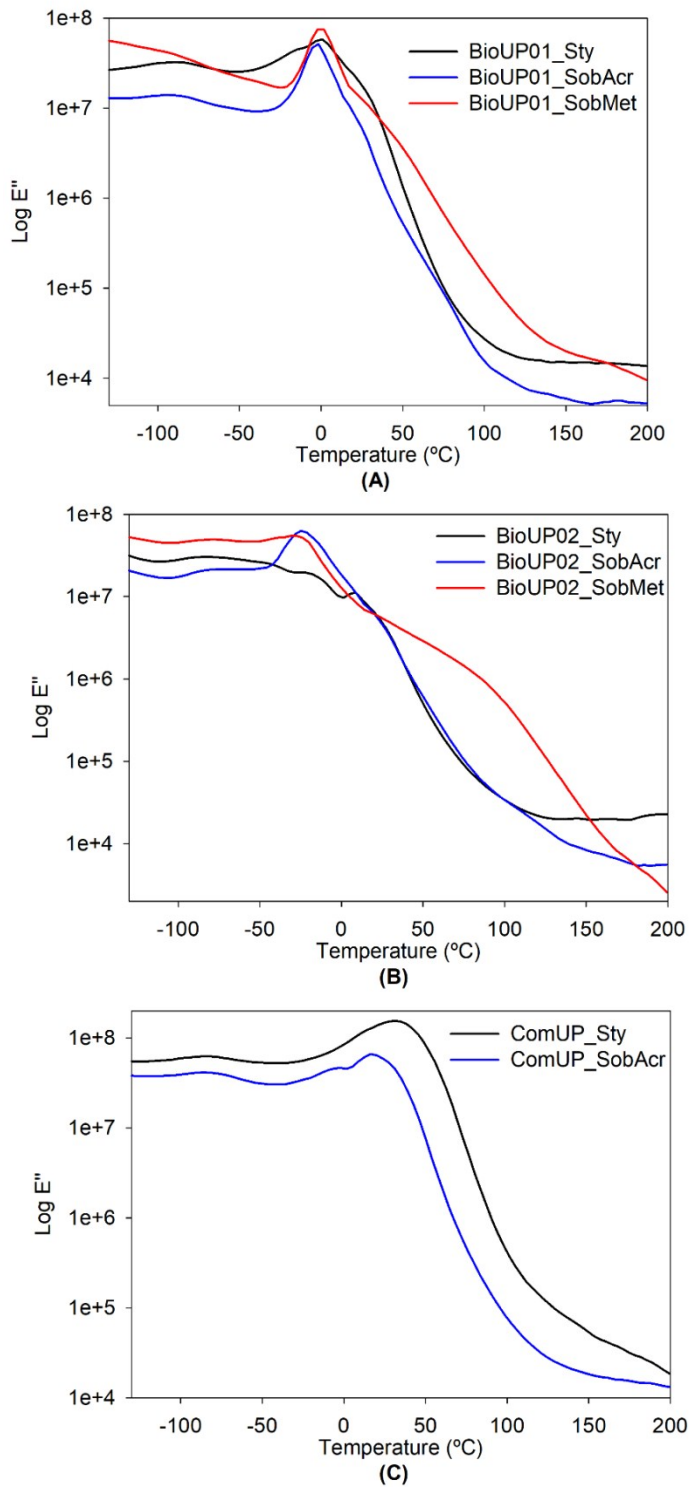

Figure S 8 - DMTA traces of the studied UPR formulations either Bio-UP1 (A), Bio-UP2 (B) or Commercial-UP (C) as the UP in terms of  $E''$ .
